# Supplementary material for: Skimmed Milk Applied as a Phytopharmaceutical Product: A Risk for Allergic Populations?
Source: MDPI journal article supplement (doi:10.3390/ijerph18052400), 2021-03-01

## Supplementary material

Figure 1S. Detailed view of the sampling area.

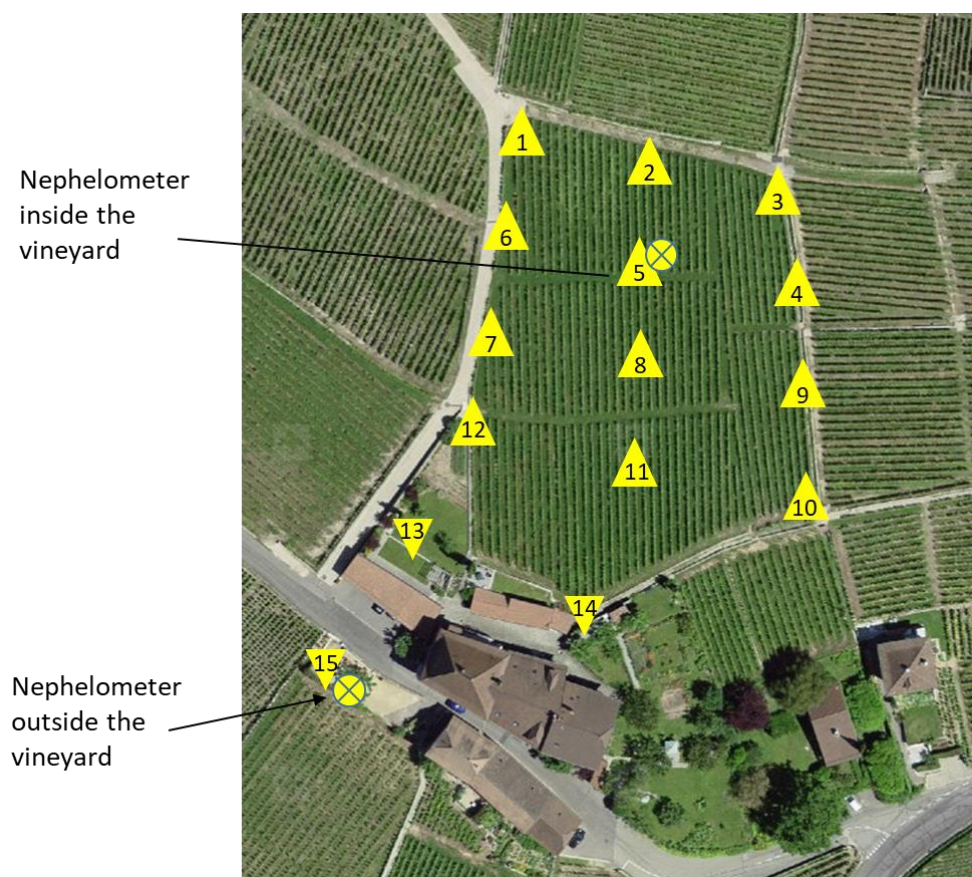

Supplement: s1 [file s1]
